# Supplementary material for: IL-1β Inflammatory Cytokine-Induced TP63 Isoform ∆NP63α Signaling Cascade Contributes to Cisplatin Resistance in Human Breast Cancer Cells
Source: Int J Mol Sci. 2019 Jan 11;20(2):270. doi: 10.3390/ijms20020270 (PMC6358904; doi:10.3390/ijms20020270)
Supplement: Supplementary file 1 [file ijms-20-00270-s001.pdf]

# IL-1 $\beta$ inflammatory cytokine induced TP63 isoform $\Delta$ Np63 $\alpha$ signaling cascade, contributes to cisplatin resistance in human breast cancer cells

Mónica G. Mendoza-Rodríguez, Jorge T. Ayala-Summano, Lázaro García-Morales, Horacio Zamudio-Meza, Eloy A. Pérez-Yepez and Isaura Meza

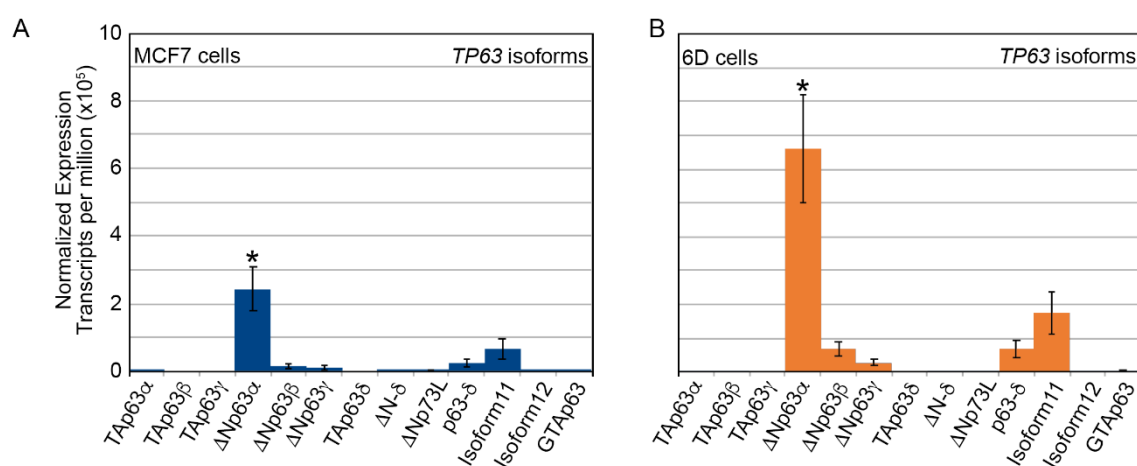

**Supplementary Figure S1.** Differential expression analysis of *TP63* isoforms. RNA-seq data from MCF7 (A) and 6D (B) cells were aligned to human genome version GRCh38 using TopHat2 (v 2.1.1) [31,32]. For differential expression of the 13 *TP63* isoforms in MCF7 and 6D cells, all reads from RNA-seq data that aligned to the genomic region corresponding to the coordinates of *TP63* gene were realigned against a reference that contains the sequence of every of the transcript variants known for this gene with TopHat2. The expression levels for each isoform was determined by Salmon (v 0.12.0) [33]. Data was normalized as transcripts per million, relative to the whole number of aligned reads for each condition from the RNA-seq dataset. Statistical differences were established by Fisher's Exact Test and asterisks indicate statistical differences in the expression of  $\Delta$ Np63 $\alpha$  in 6D cells relative to the same isoform in MCF7 cells with a P value equal to 0.003.

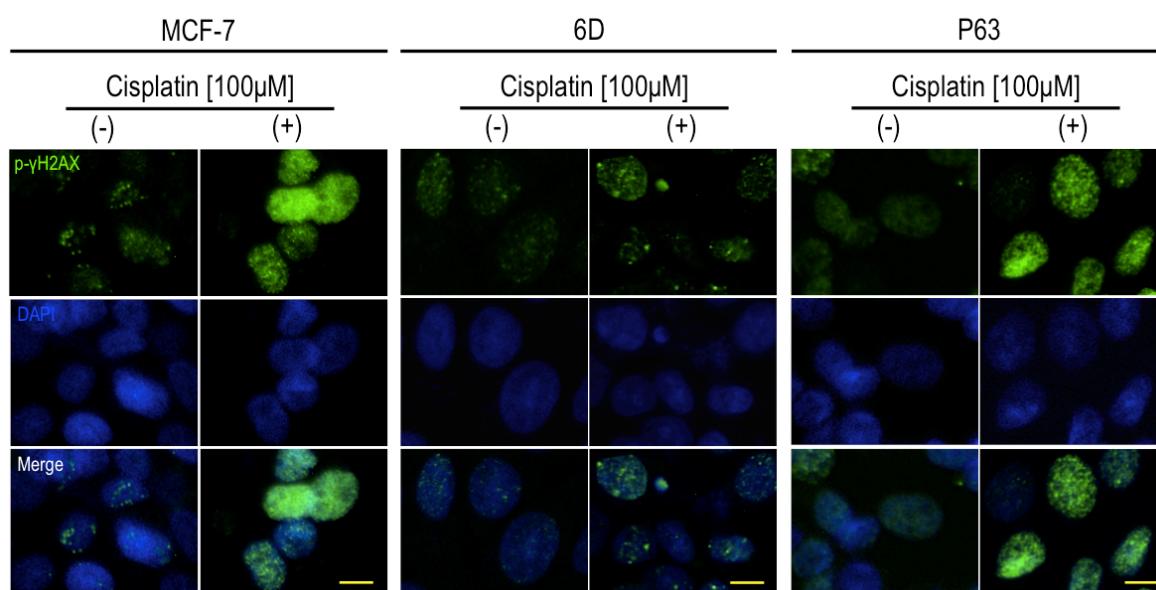

**Supplementary Figure S2.** Nuclear distribution of phosphorylated histone  $\gamma$ H2AX after cisplatin treatment of breast cancer cells. Parental MCF-7 cells, and 6D not-silenced and silenced cells (P63) were treated with 100  $\mu$ M of cisplatin for 24 h. Cells were stained with the antibody to the phosphorylated  $\gamma$ H2AX histone (p Ser139) and a secondary antibody tagged with Alexa 488 (green). Nuclei were stained with DAPI (Blue). Representative images from 10 randomly chosen fields of each experimental condition showed p $\gamma$ H2AX confined to the nuclei, forming few clusters or foci in cells not-treated with cisplatin. Significant increase of the histone labeling was observed in MCF-7 and silenced P63 cells treated with cisplatin. In contrast, 6D cells did not show increased labeling of the p $\gamma$ H2AX after treatment with the drug. Bar = 20 $\mu$ m.

**Supplementary Table S1.** Primers used for relative quantitative RT-PCR analysis.

| Gene         | Primer Bank ID | Primer Sequence                                                         | Ta (°C) | Source |
|--------------|----------------|-------------------------------------------------------------------------|---------|--------|
| <i>RPLP0</i> | None           | 5'- AGC CCA GAA CAC TGG TCT C-3'<br>5'- ACT CAG GAT TTC AAT GGT GCC-3'  | 60      | [4]    |
| <i>TP63</i>  | 169234656C3    | 5'-GTC ATT TGA TTC GAG TAG AGG GG-3'<br>5'-CTG GGG TGG CTC ATA AGG T-3' | 60      | [27]   |
